# Supplementary material for: Is Anopheles gambiae a Natural Host of Wolbachia?
Source: PubMed Central journal article supplement (PMC6561020; doi:10.1128/mbio.00784-19), 2019-06-11
Supplement: mBio.00784-19-s0001.pdf [file mBio.00784-19-s0001.pdf]

## Supplementary file 1

### *Note on Anopheles gambiae taxonomy*

*Anopheles gambiae* is currently considered a species complex containing multiple distinct genetic lineages (White et al. 2011). Here we consider only *An. gambiae* sensu stricto (previously *An. gambiae* form S) and *An. coluzzi* (*An. gambiae* form M), as these are the only members of the species complex in which *Wolbachia* was detected and characterised. *Wolbachia* specific primers were also used to amplify a fragment from *An. arabiensis* (which is also part of the *An. gambiae* complex, Shaw et al. 2016). However, as no sequences are available to characterize these infections, we have focused on the *An. gambiae* and *An. coluzzi* and we refer to these two species collectively as '*An. gambiae*'.

### *Screening for Wolbachia in Ag1000G data*

To determine if *Wolbachia* sequences are commonly found in *Anopheles gambiae*, we screened data generated in the '*Anopheles gambiae* 1000 genomes' (Ag1000G) project. We downloaded the data of the phase 1 public release, which included Illumina sequences from 765 wild caught *An. gambiae* from the European Nucleotide Archive (<https://www.ebi.ac.uk/ena/data/view/PRJEB18691>). For each of the 765 samples, a single bam file was downloaded, and all fastq reads that were classified as 'unmapped' in these files were extracted using SAMtools version 1.9 (Li et al. 2009). The extracted reads were then mapped to six complete *Wolbachia* genomes representing the major phylogenetic lineages of this genus (Table 1) using NextGenMap version 0.5.5 (Sedlazeck et al. 2013).

Table 1: List of *Wolbachia* genomes used in the screen

| Strain  | Native host                    | Supergroup | NCBI BioProject | Reference                        |
|---------|--------------------------------|------------|-----------------|----------------------------------|
| wMel    | <i>Drosophila melanogaster</i> | A          | PRJNA272        | Wu et al. 2004                   |
| wPipPel | <i>Culex pipiens</i>           | B          | PRJNA30313      | Klasson et al. 2008              |
| wOo     | <i>Onchocerca ochengi</i>      | C          | PRJEA81837      | Darby et al. 2012                |
| wBm     | <i>Brugia malayi</i>           | D          | PRJNA12475      | Foster et al. 2005               |
| wFol    | <i>Folsomia candida</i>        | E          | PRJNA299291     | Faddeeva-Vakhrusheva et al. 2017 |
| wCle    | <i>Cimex lectularius</i>       | F          | PRJDB748        | Nikoh et al. 2014                |

In accordance with the genetic divergence expected within the genus (Chung et al. 2018), and to reduce spurious alignments, we discarded all reads with an identity lower than 95% to any of the references and also excluded alignments <50bp (<50% of the average read length). Next, we followed the protocol outlined by Baldini et al. (2014) to extract the reads that matched to *Wolbachia*:

- 1) All matches to ribosomal RNA genes were excluded.
- 2) All remaining reads were blasted against the NCBI 'nt' database using a word size of 7 and further filtered:
  - We kept reads if they matched to any *Wolbachia* sequence with length >95bp and identity >80%, but only if there were no matches to other taxa with length >80bp;
  - We also kept hits to *Wolbachia* with identity >90% and no match to other taxa with identities >80%.

In addition to this *Wolbachia* screen on the level of reads, for each of the 765 libraries, we also performed meta-assemblies of all reads not mapping to the *An. gambiae* host genome. The assemblies were created with MEGAHIT version 1.1.1-2-g02102e1 (Li et al. 2015) and all resulting contigs (86,278,186 in total) were queried using blastn (e-value 1e-6) against a database of all *Wolbachia* genome assemblies available on NCBI as of March 2018 (54 in total). All contigs with identities >90% over any length were kept and queried against a local copy of the NCBI 'nt' database. Best matches were determined based on e-value and all matches to organisms other than *Wolbachia* were removed, resulting in one retained contig (Figure 1).

```
>AN0184_C_k119_68034
ACCTTGCCAACATGTCAAAGCATCTGGAAAAGCATTGAGTTTCTACCATATTGCATAAGCAAACA
GTAAAATTTTGCAACTTTTTATGTGCTTCAAAAACATATGTCCAAGCACAACCTCCAAGGTAAGCAT
CAGAGATTATTCCGGAATATCTGCTATCACAATTTCACTGTCATCCACCTTTGCTACACCTAAAT
TTGGTCTTACCGTGGTGAATGGATAATCACCTACTTTTGTATCTGCATTTGAACAGCCAGTTAAAA
ATTTTGATTTACCTATATTTGGCATAACCAATAATGCCAACGTCAGATAAACTTTTAGCTTTAATA
```

Figure 1: Putative *Wolbachia* sequence derived from a assembly of non-*Anopheles* reads from library "AN0184\_C" of the Ag1000G project

### *Analysis of NCBI BioSample SAMEA3911293*

In a recent *in silico Wolbachia* screen of many different short reads libraries from NCBI's SRA database, Pascar & Chandler (2018) detected a *Wolbachia* strain in one library (ERR1554906) annotated as *Anopheles gambiae* (NCBI BioSample accession SAMEA3911293). They have further isolated a fairly complete draft genome of this *Wolbachia* strain (Pascar & Chandler 2018). The computational pipeline employed by Pascar & Chandler (2018) was oriented towards automated detection and isolation of *Wolbachia* reads from short read libraries. While this is a powerful approach to detect so far unrecognised *Wolbachia*-host associations, the pipeline did not include a number of quality and sanity checks. Importantly, Pascar & Chandler (2018) did not check the taxonomic classification of the libraries, i.e, if the library which contained *Wolbachia* actually stems from *An. gambiae*.

To confirm that this *Wolbachia* strain was isolated from *An. gambiae*, we downloaded all reads associated with the sample (three runs in total: ERR1554906, ERR1554870, and ERR1554834). It should be noted that this sample is also part of the Ag1000G project (see above), but was not publicly released yet. Furthermore, no metadata are available for this sample on NCBI (e.g., geographical origin, tissue used for DNA extraction, number of individuals pooled, etc). We mapped the downloaded reads to the *Anopheles gambiae* reference genome (strain PEST AgamP4 that is also used as reference in the Ag1000G project) with NexGenMap as described above, but using the less sensitive default mapping options. Because the majority of reads did not map to this reference, we classified the remaining reads by:

- 1) Performing an assembly of all unmapped reads with MEGAHIT version 1.1.1-2-g02102e1 (Li et al. 2015);
- 2) Taxonomic classification of contigs of the resulting meta-assembly through BLAST+ (Camacho et al. 2009) searches against a local copy of the NCBI 'nt' database (e-value cutoff  $1e-12$ , alignment length  $\geq 100$  bp, best match was used for taxonomic assignment);
- 3) Mapping of all reads not matching the *Anopheles gambiae* reference genome to the meta-assembly, and assigning the reads with the classifications of the contigs they mapped to.

The results of this classification are depicted in Figure 3 (main manuscript). The majority of reads not mapping to the reference could be classified as different *Anopheles* species. Among other common taxa encountered in the sample are several potential *Wolbachia* hosts (*Culex*, *Aedes*, *Wuchereria*). This demonstrates that the investigated libraries were not constructed from a "pure" *Anopheles gambiae* sample, but rather from a pool of different host species (including *An. gambiae*

and at least one other *Anopheles* species), potentially a metagenomic sample. Without metadata it is however not possible to determine how this sample was collected.

To identify other potential *Anopheles* species in the libraries, we performed phylogenetic analyses based on two markers commonly used in *Anopheles* species assignment: mitochondrial cytochrome C oxidase subunit 1 (COI) and internal transcribed spacer 2 (ITS2). We identified these fragments in the meta-assembly by BLAST searches using the corresponding *An. gambiae* sequences as query. After merging overlapping but otherwise identical matches, we found three and two distinct sequences for ITS2 and COI, respectively. Phylogenetic analyses were performed on alignments of these sequences together with reference sequences from previous phylogenetic studies on *Anopheles* (Lobo et al. 2015; Norris & Norris 2015). The corresponding phylogenetic reconstructions are depicted in Supplementary Figure S1A and B.

For both ITS2 and COI, we found haplotypes in the investigated libraries that clustered within the *An. gambiae* complex and therefore likely stem from *An. gambiae* or a very closely related species. However, for both loci we also recovered a sequence that is only very distantly related to *An. gambiae*. In the ITS2 tree, the sequences are almost identical to a sequence from a presumably undescribed *Anopheles* species, denominated “species A” in Stevenson et al. (2012) and “N1” in Lobo et al. (2015). In the COI tree, there is no very close match to the haplotype from the short read library, but it is evident that *An. gambiae* is only distantly related. Closer inspection of our metaassembly revealed the presence of a single contig spanning the complete mitochondrial genome of this species. Online BLAST searches against the NCBI database showed that it is only ~92% identical to the closest mitochondrial genome in the database (*An. stephensi*) and only 91% identical to the mitochondrial genome of *An. gambiae*.

These findings, together with the taxonomic classification of the reads in this sample discussed above, strongly suggest that in addition to *An. gambiae*, there is at least one other *Anopheles* species (most likely “species A”) present in the sample SAMEA3911293. Because *Wolbachia* was not detected in our screen of 765 *An. gambiae* samples, we think that it is very likely that the *Wolbachia* sequences in this sample stem from the *Anopheles* “species A”, or even a third species (e.g., *Culex* or *Aedes*) rather than from *An. gambiae*. Intriguingly, in the PCR based *Wolbachia* screen by Jeffries et al. (2018), *Anopheles* “species A” was found to be frequently infected with a *Wolbachia* strain of supergroup B that is distinct from other so far sequenced supergroup B strains. Our phylogenetic reconstruction of *Wolbachia* supergroup B based on core genome loci (Supplementary Figure S1C) further supports our interpretation, as the *Wolbachia* strain isolated from the investigated short read libraries clusters within *Wolbachia* supergroup B, but is distinct from other strains of this phylogenetic group.

### *Screening for Wolbachia in amplicon data generated from water storage containers*

To assess the plausibility of *Wolbachia* sequences being obtained by *Anopheles* larvae from environmental sources, we explored a 16S amplicon dataset generated in a study investigating the bacterial composition of water storage containers with and without mosquito larvae (Nilsson et al. 2018). We downloaded the raw reads associated with this study from <https://www.ncbi.nlm.nih.gov/bioproject/436283> and used NextGenMap to align all reads against a collection of *Wolbachia* 16S rRNA comprising all known supergroups of *Wolbachia*, which was taken from Glowska et al. (2015). We found hits in 9 out of 80 investigated libraries, including libraries constructed from water with and without inhabiting mosquitoes. Consensus sequences were created from all reads of a single library that matched *Wolbachia*, and each candidate *Wolbachia* sequence was blasted against the NCBI 'nt' database. All sequences matched a *Wolbachia* sequence in the database with at least 98% identity and 99% query coverage, confirming these sequences to be originating from *Wolbachia*.

This brief analysis demonstrates that *Wolbachia* sequences can be detected in amplicon sequences from environmental sources even if no apparent *Wolbachia* host is present. This highlights the importance of further verification of *Wolbachia* presence if determined with highly sensitive methods such as massively parallel amplicon sequencing, which is especially prone to contamination.

### **References**

- Baldini F, Segata N, Pompon J, Marcenac P, Robert Shaw W, Dabiré RK, Diabaté A, Levashina E a, Catteruccia F (2014) Evidence of natural *Wolbachia* infections in field populations of *Anopheles gambiae*. *Nature Communications* **5**, 3985.
- Camacho C, Coulouris G, Avagyan V, Ma N, Papadopoulos J, Bealer K, Madden TL (2009) BLAST+: architecture and applications. *BMC Bioinformatics* **10**, 421.
- Chung M, Munro JB, Hotopp JCD (2018) Using core genome alignments to assign bacterial species. *mSystems* **3**, e00236-18.
- Darby AC, Armstrong SD, Bah GS, Kaur G, Hughes MA, Kay SM, Koldkjær P, Radford AD, Blaxter ML, Tanya VN, Trees AJ, Cordaux R, Wastling JM, Makepeace BL (2012) Analysis of gene expression from the *Wolbachia* genome of a filarial nematode supports both metabolic and defensive roles within the symbiosis. *Genome Research* **22**, 2467–2477.
- Faddeeva-Vakhrusheva A, Kraaijeveld K, Derks MFL, Anvar SY, Agamennone V, Suring W, Kampfraath AA, Ellers J, Le Ngoc G, van Gestel CAM, Mariën J, Smit S, van Straalen NM,

- Roelofs D (2017) Coping with living in the soil: the genome of the parthenogenetic springtail *Folsomia candida*. *BMC Genomics* **18**, 493.
- Foster J, Ganatra M, Kamal I, Ware J, Makarova K, Ivanova N, Bhattacharyya A, Kapatral V, Kumar S, Posfai J, Vincze T, Ingram J, Moran L, Lapidus A, Omelchenko M, Kyrpides N, Ghedin E, Wang S, Goltsman E, Joukov V, Ostrovskaya O, Tsukerman K, Mazur M, Comb D, Koonin E, Slatko BE (2005) The *Wolbachia* genome of *Brugia malayi*: Endosymbiont evolution within a human pathogenic nematode. *PLoS Biology* **3**, 599–614.
- Głowska E, Dragun-Damian A, Dabert M, Gerth M (2015) New *Wolbachia* supergroups detected in quill mites (Acari: Syringophilidae). *Infection, Genetics and Evolution* **30**, 140–146.
- Jeffries CL, Lawrence GG, Golovko G, Kristan M, Orsborne J, Spence K, Hurn E, Bandibabone J, Tantely LM, Raharimalala FN, Keita K, Camara D, Barry Y, Wat'senga F, Manzambi EZ, Afrane, YA, Mohammed AR, Abeku TA, Hedge S, Khanipov K, Pimenova M, Fofanov Y, Boyer S, Irish SR, Hughes GL, Walker T (2018) Novel *Wolbachia* strains in *Anopheles* malaria vectors from Sub-Saharan Africa Wellcome Open Research **3**, 113.
- Klasson L, Walker T, Sebahia M, Sanders MJ, Quail MA, Lord A, Sanders S, Earl J, O'Neill SL, Thomson N, Sinkins SP, Parkhill J (2008) Genome Evolution of *Wolbachia* Strain wPip from the *Culex pipiens* Group. *Molecular Biology and Evolution* **25**, 1877–1887.
- Li D, Liu C-M, Luo R, Sadakane K, Lam T-W (2015) MEGAHIT: an ultra-fast single-node solution for large and complex metagenomics assembly via succinct de Bruijn graph. *Methods of Biochemical Analysis* **31**, 1674–1676.
- Li H, Handsaker B, Wysoker A, Fennell T, Ruan J, Homer N, Marth G, Abecasis G, Durbin R, 1000 Genome Project Data Processing Subgroup (2009) The sequence alignment/map format and SAMtools. *Methods of Biochemical Analysis* **25**, 2078–2079.
- Nikoh N, Hosokawa T, Moriyama M, Oshima K, Hattori M, Fukatsu T (2014) Evolutionary origin of insect-*Wolbachia* nutritional mutualism. *Proceedings of The National Academy of Sciences of The United States of America* **111**, 10257–10262.
- Nilsson LKJ, Sharma A, Bhatnagar RK, Bertilsson S, Terenius O (2018) Presence of *Aedes* and *Anopheles* mosquito larvae is correlated to bacteria found in domestic water-storage containers. *FEMS Microbiology Ecology* **94**, fiy058.
- Pascariu J, Chandler CH (2018) A bioinformatics approach to identifying *Wolbachia* infections in arthropods. *PeerJ* **6**, e5486.
- Sedlazeck FJ, Rescheneder P, von Haeseler A (2013) NextGenMap: fast and accurate read mapping in highly polymorphic genomes. *Methods of Biochemical Analysis* **29**, 2790–2791.
- Shaw WR, Marcenac P, Childs LM, Buckee CO, Baldini F, Sawadogo SP, Dabiré RK, Diabaté A, Catteruccia F (2016) *Wolbachia* infections in natural *Anopheles* populations affect egg laying and negatively correlate with *Plasmodium* development. *Nature Communications* **7**, 11772.
- Stevenson J, Laurent BS, Lobo NF, Cooke MK, Kahindi SC, Oriango RM, Harbach RE, Cox J, Drakeley C (2012) Novel vectors of malaria parasite in the western highlands of Kenya. *Emerging infectious diseases* **18**, 1547.
- White BJ, Collins FH, Besansky NJ (2011) Evolution of *Anopheles gambiae* in relation to humans and malaria. *Annual Review of Ecology, Evolution, and Systematics* **42**, 111–132.
- Wu M, Sun LV, Vamathevan J, Riegler M, Deboy R, Brownlie JC, McGraw EA, Martin W, Esser C, Ahmadinejad N, Wiegand C, Madupu R, Beanan MJ, Brinkac LM, Daugherty SC, Durkin AS, Kolonay JF, Nelson WC, Mohamoud Y, Lee P, Berry K, Young MB, Utterback T, Weidman J, Nierman WC, Paulsen IT, Nelson KE, Tettelin H, O'Neill SL, Eisen JA (2004) Phylogenomics of

the reproductive parasite *Wolbachia pipientis* wMel: a streamlined genome overrun by mobile genetic elements. *PLoS Biology* **2**, e69.
