# Supplementary material for: Is Anopheles gambiae a Natural Host of Wolbachia?
Source: PubMed Central journal article supplement (PMC6561020; doi:10.1128/mbio.00784-19), 2019-06-11

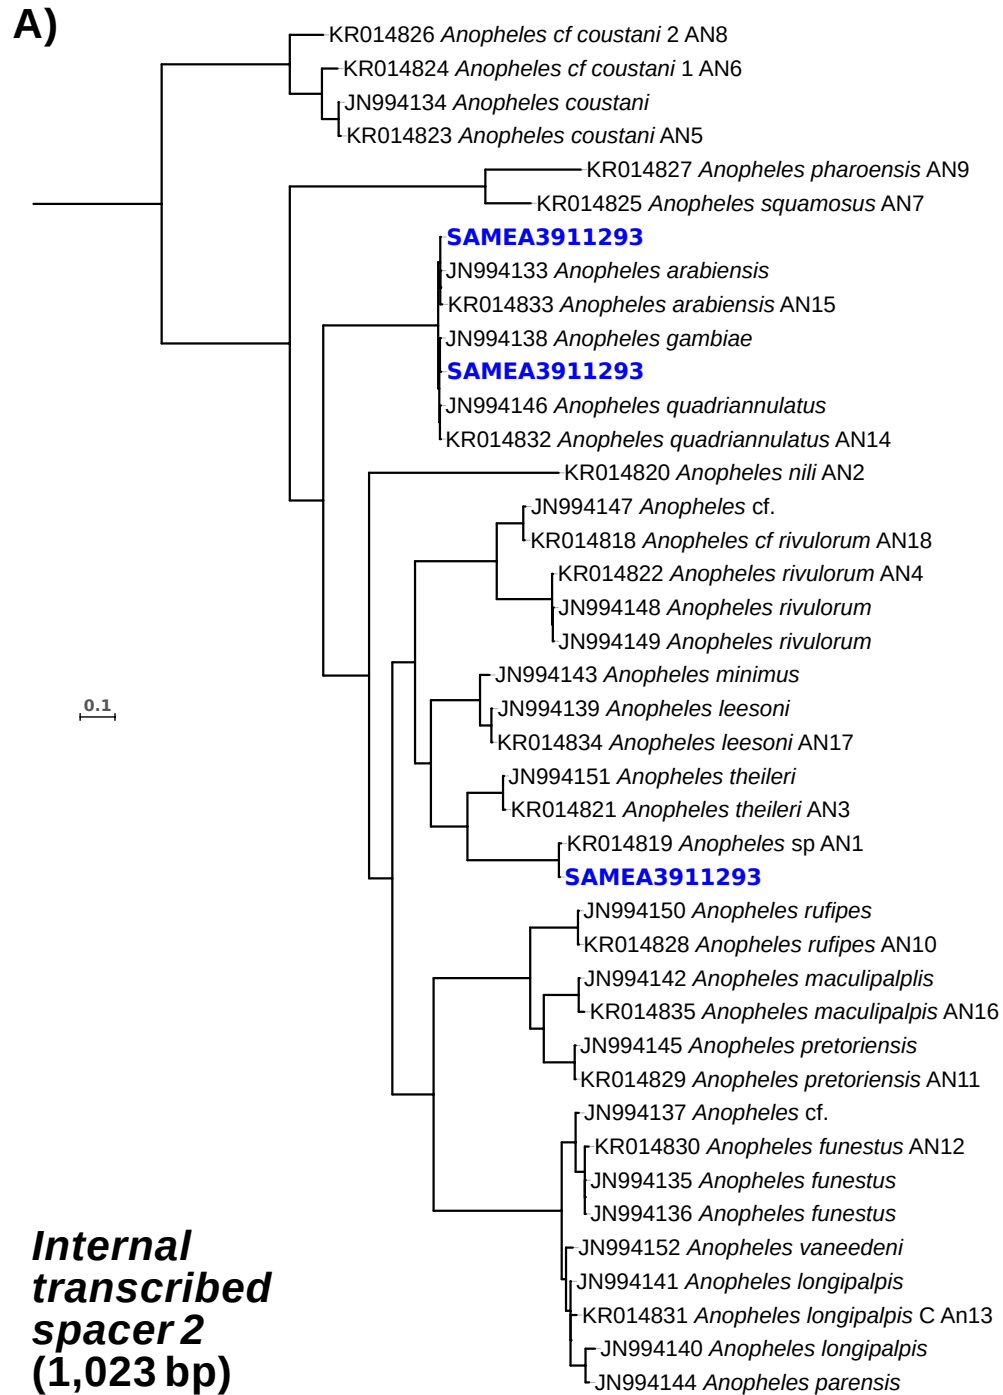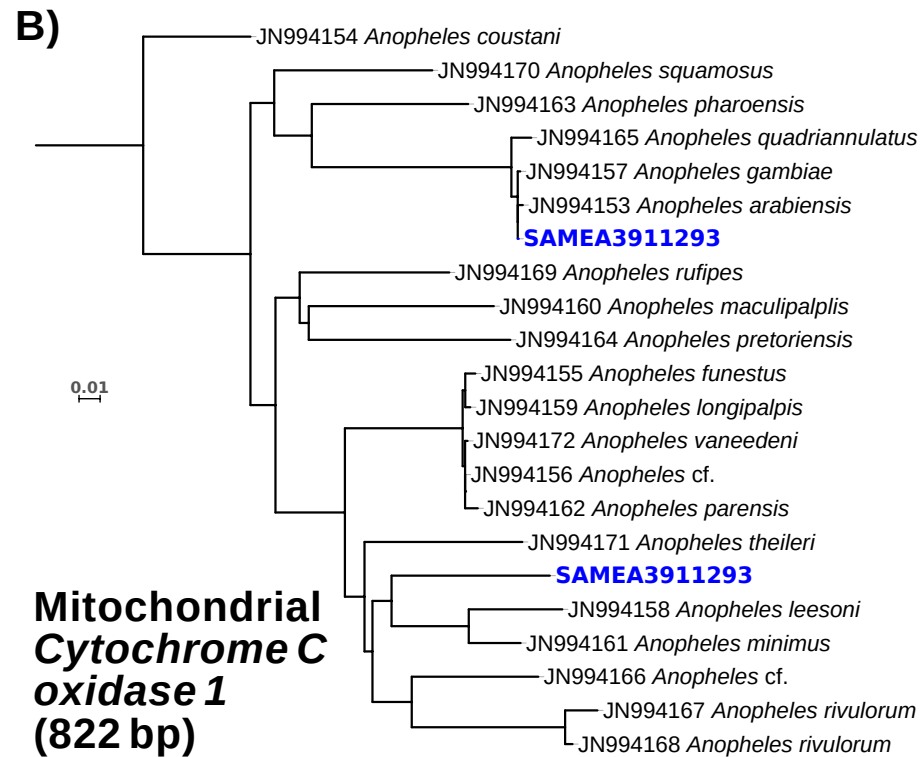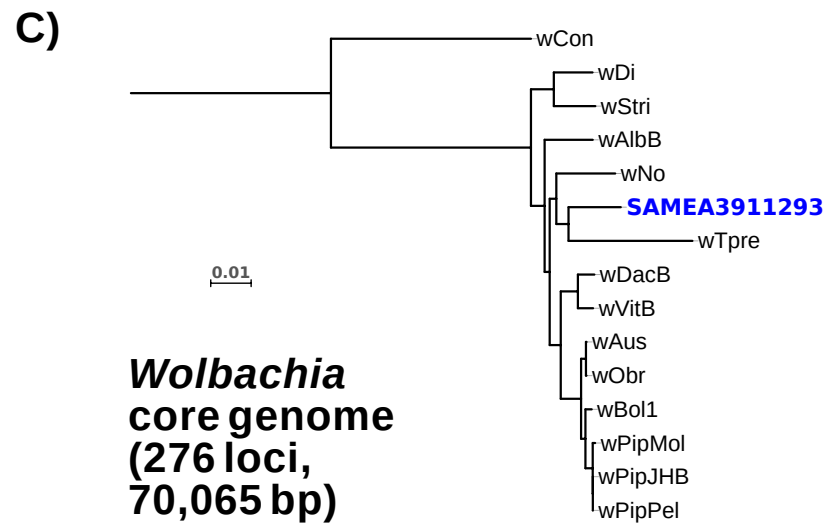

Supplement: mBio.00784-19-sf001.pdf [file mBio.00784-19-sf001.pdf]
